# Supplementary material for: Effects of Substituting Activated Carbon with Titanium-Dioxide-Coated Cenospheres in Conventional Aquarium Filters
Source: MDPI journal article supplement (doi:10.3390/environments10110188), 2023-10-31
Supplement: s1 [file s1]

Archive with 1 entries (1 files):
- environments-2516251-supplementary.pdf
